# Supplementary material
Source: publisher figshare collection journal article supplement (https://frontiersin.figshare.com/ndownloader/files/34909371)
Supplement: Supplementary file 1 [file 34909371]

Hydrophobic outer membrane pores boost testosterone hydroxylation by cytochrome P450 BM3 containing cells

Carolin Bertelmann1, Magdalena Mock1, Rainhard Koch2, Andreas Schmid1, Bruno Bühler1*

1Department of Solar Materials, Helmholtz Centre for Environmental Research GmbH - UFZ, Leipzig, Germany

2Engineering and Technology, Bayer AG, Leverkusen, Germany

*** Correspondence:**Bruno Bühler
bruno.buehler@ufz.de

Supplementary Material

# Supplementary Figures and Tables

## Supplementary Tables

Table S1. Outer membrane pores or import systems potentially facilitating steroid uptake by *E. coli*

| **Protein(s) of interest** | **Original organism** | **GenBank accession number or NCBI reference sequence** | **Molecular weight (kDa)** | **(Putative) function/ natural substrate** | **References** |
| --- | --- | --- | --- | --- | --- |
| **AlkL** | *Pseudomonas putida* GPo1 | CAB54056 | 23 | alkanes | (van Beilen et al., 1992) |
| **AupA**  **AupB** | *Marinobacter hydrocarbonoclasticus* SP17 | H8WEC1  H8WEC0 | 49*  113* | alkanes (C19-C31) | (Mounier et al., 2018) |
| **FadL** | *Escherichia coli* BL21-Gold(DE3) | CAD6007925 | 49 | long-chain fatty acids | (Black, 1988; Call et al., 2016; Jeon et al., 2018) |
| **FhuA Δ1-160** | *Escherichia coli* MG1655 | WP_000124402  (without deletion) | 65* | iron(III)-hydroxamate | (Ruff et al., 2016; Liu et al., 2017) |
| **MFS (**Major Facilitator Superfamily Transporter) | *Comamonas thiooxydans* | WP_041743963 | 48* | testosterone | (Olivera and Luengo, 2019) |
| **ORF664**  **ORF665** | *Acinetobacter venetianus* RAG-1 | WP_004877570  none deposited for ORF665** | 163*  29* | dodecane | (Kothari et al., 2016) |
| **PhlX** | *Ralstonia eutropha* JMP34 | AAC77387 | 49** | phenol | (Ayoubi and Harker, 1998) |
| **TodX** | *Pseudomonas putida* F1 | WP_012052603 | 48 | toluene | (Wang et al., 1995; Hearn et al., 2008) |
| **XylN** | *Pseudomonas putida* mt-2_pWWO | WP_011005927 | 47 | xylenes | (Kasai et al., 2001) |

* estimated *via* https://www.sciencegateway.org/tools/proteinmw.htm

** amino acid sequence ORF665: MPSITPVTRSIGLPSVPPVMPSITPVTRSIGLPSVPPVIPSITPVTKSIGLPSVPPVIPSITPVTKSIGLPSVPPVIPSMTPVTRSIGLPSVPPVMPSITPVTKSIGLPSVPPVMPSITPVTRSIGLPSVPPVIPSITPVTKSIGLPSVPPVMPSITPVTKSIGLPSVPPVMPSMTPVTRSIGLLSVPPVIPSITPVTISSGVPSVRLPKLPRSLPMCWTTSVAVEPLLINVSTTPDTESIAPLKSAPAKSETASKEPFTVSREVSKVSVPRSAVSPIGCSD

Table S2. Bacterial strains and plasmids used in this study

| **Strain or plasmid** | **Characteristics** | **Strain abbreviation** | **Reference** |
| --- | --- | --- | --- |
| **Strains** |  |  |  |
| *E. coli* DH5α | *sup*E44Δ*lacU*169(Φ80 *lacZ*ΔM15) *hsd*R17 *rec*A1 *end*A1 *gyr*A96 *thi*-1 *rel*A1 |  | (Hanahan, 1983) |
| *E. coli* BL21-Gold(DE3) | F– *ompT hsdS(rB– mB–) dcm+* *TetR gal*λ(DE3) *endA* Hte | WT | Agilent Technologies, Santa Clara, USA |
| **Plasmids** |  |  |  |
| pETM11 | pMB1 ori, *lac*-regulatory system (*lacI*, *PT7*), KmR, pETM11 RBS | EV | EMBL Vector collection, Heidelberg, Germany |
| pETM11_KSA1 | pETM11 derivative with 6xHis-tagged BM3 mutant gene *ksa1* | KSA1 | (Kille et al., 2011) |
| pETM11_KSA2 | pETM11 derivative with 6xHis-tagged BM3 mutant gene *ksa2* | KSA2 | (Kille et al., 2011) |
| pETM11_KSA3 | pETM11 derivative with 6xHis-tagged BM3 mutant gene *ksa3* | KSA3 | (Kille et al., 2011) |
| pETM11_KSA14 | pETM11 derivative with 6xHis-tagged BM3 mutant gene *ksa14* | KSA14 | (Kille et al., 2011) |
| pETM11_KSA14m | pETM11 derivative with 6xHis-tagged BM3 mutant gene *ksa14m* | KSA14m | This study |
| pETM11_KSA14m_aupBA | pETM11_KSA14m derivative with codon-optimized *aupA* and *aupB* genes from *Marinobacter hydrocarbonoclasticus* SP17 | AupA/B | This study |
| pETM11_KSA14m_fadL | pETM11_KSA14m derivative with *fadL* gene from *E. coli* BL21-Gold(DE3) | FadL | This study |
| pETM11_KSA14m_fhuAΔ1-160 | pETM11_KSA14m derivative with *fhuAΔ1-160* gene from *E. coli* MG1655 | FhuAΔ1-160 | This study |
| pETM11_KSA14m_mfs | pETM11_KSA14m derivative with codon-optimized *mfs* gene from *Comamonas thiooxydans* | MFS | This study |
| pETM11_KSA14m_orf | pETM11_KSA14m derivative with codon-optimized *orf664* and *orf665* from *Acinetobacter venetianus* RAG-1 | ORF664/665 | This study |
| pETM11_KSA14m_phlX | pETM11_KSA14m derivative with codon-optimized *phlX* gene from *Ralstonia eutropha* JMP34 | PhlX | This study |
| pETM11_KSA14m_todX | pETM11_KSA14m derivative with *todX* gene from *P. putida* F1 | TodX | This study |
| pETM11_KSA14m_xylN | pETM11_KSA14m derivative with *xylN* gene from *P. putida* mt-2_pWWO | XylN | This study |
| pETM11_KSA1_alkL | pETM11_KSA1 derivative with *alkL* gene from *P. putida* GPo1 | KSA1-AlkL | This study |
| pETM11_KSA2_alkL | pETM11_KSA2 derivative with *alkL* gene from *P. putida* GPo1 | KSA2-AlkL | This study |
| pETM11_KSA3_alkL | pETM11_KSA3 derivative with *alkL* gene from *P. putida* GPo1 | KSA3-AlkL | This study |
| pETM11_KSA14_alkL | pETM11_KSA14 derivative with *alkL* gene from *P. putida* GPo1 | KSA14-AlkL | This study |
| pETM11_KSA14m_alkL | pETM11_KSA14m derivative with *alkL* gene from *P. putida* GPo1 | KSA14m-AlkL | This study |
| pETM11_alkL | pETM11 derivative with *alkL* gene from *P. putida* GPo1 | pETM11-alkL | This study |

Table S3. Primer sequences and PCR templates used for the construction of pETM11 plasmids that, besides different CYP450 BM3 variants, carry genes encoding membrane proteins. Genes encoding the respective outer membrane proteins were amplified from various sources using suitable primers. Primers contained the pETM11 ribosomal binding site (bold), NotI and XhoI restriction sites (underlined) and 25 bp overhangs complementary to pETM11 to be introduced adjacent to the amplified gene unless stated otherwise in the “PCR template” column. The resulting amplicons were inserted into the different pETM11_KSA vectors (excised with NotI and XhoI) by either *in vitro* assembly (Gibson et al., 2009) or restriction and digestion. Final plasmid constructs were then introduced into *E. coli* BL21-Gold(DE3).

| **Protein(s) of interest** | **Plasmid** | **Primer** | **Sequence (5’🡪3’)** | **PCR template** | **Additional information** |
| --- | --- | --- | --- | --- | --- |
| **AlkL** | pETM11_KSA1_alkL  pETM11_KSA2_alkL  pETM11_KSA3_alkL  pETM11_KSA14_alkL  pETM11_KSA14m_alkL  pETM11_alkL | AlkL_for     AlkL_rev | GTAAGAGCTCCGTCGACAAGCTTGCGGCCGC**TAACTTTAAGAAGGAGATATACC**ATGAGTTTTTCTAATTATAAAGTAATCG  ATCTCAGTGGTGGTGGTGGTGGTGCTCGAGTTAGAAAACATATGACGCACC | pCW3A4LS (derived from pLAFR3-AlkL (Cornelissen et al., 2013)) | inserted by *in vitro* assembly |
| **AupA/B** | pETM11_KSA14m_aupBA | AupB_for  AupB_rev    AupA_for  AupB_rev | GTAAGAGCTCCGTCGAC  **TATCTCCTTCTTAAAGTTA**CCTAGGTTATTCATACTGCGCCGGAATTTC  CCTAGG**TAACTTTAAGAAGG**  TCTCAGTGGTGGTGGTGGTGGTGCCTCGAGTTAAAACTTCAGGGTGATGC | AupA/B gene synthesis product (codon-optimized for *E. coli* B strains);  already contained NotI site and RBS upstream of *aupB* and RBS upstream of *aupA*, therefore primer AupB_for binds in a region not relevant for expression and AupB_rev/AupA_for partly binds to the RBS sequence | inserted by *in vitro* assembly |
| **FadL** | pETM11_KSA14m_fadL | FadL_for     FadL_rev | GTAAGAGCTCCGTCGACAAGCTTGCGGCCGC**TAACTTTAAGAAGGAGATATACC**ATGAGCCAGAAAACCCTG  ATCTCAGTGGTGGTGGTGGTGGTGCTCGAGTCAGAACGCGTAGTTAAAG | genomic DNA from *Escherichia coli* BL21-Gold(DE3) | inserted by *in vitro* assembly |
| **FhuAΔ1-160** | pETM11_KSA14m_fhuAΔ1-160 | FhuA_for     FhuA_SSrev   FhuA_afterSS  FhuA_rev    FhuA_fusion_for FhuA_fusion_rev | GTAAGAGCTCCGTCGACAAGCTTGCGGCCGC**TAACTTTAAGAAGGAGATATACC**ATGGCGCGTTCCAAAACTG  CGGCTTTAAACTGAACTTCTTTCAGTGCCTGTGCATAAACAGAC  CTGAAAGAAGTTCAGTTTAAAG  ATCTCAGTGGTGGTGGTGGTGGTGCTCGAGTTAGAAACGGAAGGTTGC  GTAAGAGCTCCGTCGAC  ATCTCAGTGGTGGTGGTG | genomic DNA from *Escherichia coli* MG1655 | after amplification of the DNA fragments encoding the signal sequence (SS) and FhuAΔ1-160, both fragments were combined in a fusion PCR  inserted by *in vitro* assembly |
| **MFS**  NCBI Reference Sequence: WP_041743963.1 | pETM11_KSA14m_mfs | MFS_for   MFS_rev | GTAAGAGCTCCGTCGACAAGCTTGCGCGGCCGC**TAACTTTAAG**  ATCTCAGTGGTGGTGGTGGTGGTGCTCGAGTTACGCCGCATTCATCTGCAG | MFS gene synthesis product (codon-optimized for *E. coli* B strains);  already contained RBS upstream of *mfs*, therefore primer MFS_for partly binds to the RBS sequence and not the gene | inserted by *in vitro* assembly |
| **ORF664/665** | pETM11_KSA14m_orf | 664_for     664_rev    665_for  665_rev | GTAAGAGCTCCGTCGACAAGCTTGCGGCCGC**TAACTTTAAGAAGGAGATATACC**ATGCTTTTTAAAAACATCC  **TATCTCCTTCTTAAAGTTA**CCTAGGTTAAAACAGATTCAGGCTATGAAACAGC  CCTAGG**TAACTTTAAGAAGG**  ATCTCAGTGGTGGTGGTGGTGGTGCTCGAGTTAATCGCTGCAGCCAATC | ORF664 and ORF665 gene synthesis products (codon-optimized for *E. coli* B strains);  already contained RBS upstream of *orf665*, therefore primers 664_rev and 665_for partly bind to the RBS sequence and not the gene | inserted by *in vitro* assembly |
| **PhlX** | pETM11_KSA14m_phlX | PhlX_for   PhlX_rev | GTAAGAGCTCCGTCGACAAGCTTGCGGCCGC**TAACTTTAAGAAGGAGATATACC**ATGCCCCGCGCTTCTTTATC  ATCTCAGTGGTGGTGGTGGTGGTGCTCGAGTTAAAAGCGTTTGCGATACGC | PhlX gene synthesis product (codon-optimized for *E. coli* B strains) | inserted by *in vitro* assembly |
| **TodX** | pETM11_KSA14m_todX | TodX_for     TodX_rev | GTAAGAGCTCCGTCGACAAGCTTGCGGCCGC**TAACTTTAAGAAGGAGATATACC**ATGAAGATTGCCAGCGTG  ATCTCAGTGGTGGTGGTGGTGGTGCTCGAGTTAAAAATTTTTGCTATAGGAAACCACTGC | genomic DNA from *Pseudomonas putida* F1 | inserted by *in vitro* assembly |
| **XylN** | pETM11_KSA14m_xylN | XylN_for    XylN_rev | GCGGCCGC**TAACTTTAAGAAGGAGATATACC**ATGAAAATAAAAAATTTACCCAATAAAG  CTCGAGTCAGAATGAATAATTATAGGCC | genomic DNA from *Pseudomonas putida* mt-2_pWWO | inserted by restriction and ligation |

Table S4. Performance of permeabilized *E. coli* BL21-Gold(DE3) cells carrying the BM3 variants of interest (Kille et al., 2011).

| **Strain** | **Conversion of 1 mM testosterone in 24h [%]** | **Regioselectivity [%]** | **Volumetric activity [U L-1]*** |
| --- | --- | --- | --- |
| KSA1 | 79 | 97[a] | 0.55 |
| KSA2 | 67 | 94[a] | 0.47 |
| KSA3 | 53 | 94[a] | 0.37 |
| KSA14 | 85 | 96[b] | 0.58 |

* Volumetric activities were estimated based on reported conversions in 24 h.

[a] towards 2β-hydroxylated product; [b] towards 15β-hydroxylated product

Table S5. Regioselectivity of *E. coli* BL21-Gold(DE3) harboring different BM3 variants.

|  | Cultivation in TB medium | | Cultivation in M9 medium |
| --- | --- | --- | --- |
| Strain | Permeabilized cells | Resting cells | Resting cells |
| KSA1[a] | 100* | 98.0 ± 0.6 | 97.3 ± 0.1 |
| KSA2[a] | 100* | 100* | 96.9 ± 1.1 |
| KSA3[a] | 100* | 100* | 97.6 ± 1.4 |
| KSA14[b] | 97.7 ± 0.1 | 92.9 ± 0.2 | 92.0 ± 0.0 |
| KSA14m[b] | 96.6 ± 0.4 | 90.4 ± 0.3 | 84.9 ± 0.5 |

[a] towards 2β-hydroxytestosterone; [b] towards 15β-hydroxytestosterone; * 15β-hydroxytestosterone not detected.

Cells were prepared as permeabilized and living resting cells after growth in TB or M9 medium as described in the materials and methods section. Biotransformations were carried out for 1 h.

## Supplementary Figures


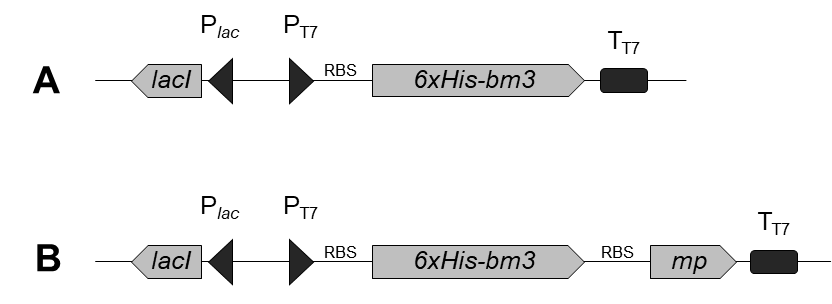


Figure S1. Genetic constructs applied (A) for expression of the genes encoding respective BM3 variants under control of the *lacI*-based T7 expression system and (B) for co-expression of the genes encoding respective BM3 variants in combination with outer membrane proteins (mp) in a bicistronic operon.

Figure S2. Volumetric activities of permeabilized *E. coli* BL21-Gold(DE3) cells carrying the BM3 variants of interest. Cell cultivation and heterologous protein synthesis was conducted in modified TB medium (Kille et al., 2011). For permeabilization, cells were resuspended in P450 reaction buffer and prepared via freeze-thawing and EDTA addition. Reactions were started by adding testosterone in DMSO (to final concentrations of 1 mM and 1% (v/v), respectively). Average values and standard deviations of two biological replicates are given.

Figure S3. Specific growth rates of *E. coli* BL21-Gold(DE3) strains carrying pETM11 with *ksa14m* and the genes encoding different membrane proteins during cultivation in M9 medium supplemented with 0.5% (w/v) glucose upon induction with 0.1 mM IPTG and addition of 0.5 mM 5-aminolevulinic acid. Average values and standard deviations of two biological replicates are given.

Figure S4. Time courses of testosterone biotransformation by *E. coli* BL21-Gold(DE3) whole-cell biocatalysts carrying pETM11 with *ksa14m* together with or without *alkL*. The substrate testosterone (dashed lines) is converted to 2β- and 15β-hydroxytestosterone, respectively (sum of products: solid lines). Cell cultivation and heterologous protein synthesis were performed in M9 medium supplemented with 0.5% (w/v) glucose. Resting cell preparation and activity assays were performed as described in the Materials and Methods section. Reactions were started by the addition of testosterone in DMSO (1 mM and 1% (v/v) final concentrations, respectively). Average values and standard deviations of two biological replicates are given.

# References

Ayoubi, P.J., and Harker, A.R. (1998). Whole-cell kinetics of trichloroethylene degradation by phenol hydroxylase in a *Ralstonia eutropha* JMP134 derivative. *Appl Environ Microbiol* 64(11)**,** 4353-4356. doi: 10.1128/AEM.64.11.4353-4356.1998.

Black, P.N. (1988). The *fadL* gene product of *Escherichia coli* is an outer membrane protein required for uptake of long-chain fatty acids and involved in sensitivity to bacteriophage T2. *J Bacteriol* 170(6)**,** 2850-2854. doi: 10.1128/jb.170.6.2850-2854.1988.

Call, T.P., Akhtar, M.K., Baganz, F., and Grant, C. (2016). Modulating the import of medium-chain alkanes in *E. coli* through tuned expression of FadL. *J Biol Eng* 10**,** 5. doi: 10.1186/s13036-016-0026-3.

Cornelissen, S., Julsing, M.K., Volmer, J., Riechert, O., Schmid, A., and Bühler, B. (2013). Whole-cell-based CYP153A6-catalyzed (*S*)-limonene hydroxylation efficiency depends on host background and profits from monoterpene uptake via AlkL. *Biotechnol Bioeng* 110(5)**,** 1282-1292. doi: 10.1002/bit.24801.

Hanahan, D. (1983). Studies on transformation of *Escherichia coli* with plasmids. *J Mol Biol* 166(4)**,** 557-580. doi: 10.1016/s0022-2836(83)80284-8.

Hearn, E.M., Patel, D.R., and van den Berg, B. (2008). Outer-membrane transport of aromatic hydrocarbons as a first step in biodegradation. *Proc Natl Acad Sci U S A* 105(25)**,** 8601-8606. doi: 10.1073/pnas.0801264105.

Jeon, E.-Y., Song, J.-W., Cha, H.-J., Lee, S.-M., Lee, J., and Park, J.-B. (2018). Intracellular transformation rates of fatty acids are influenced by expression of the fatty acid transporter FadL in *Escherichia coli* cell membrane. *J Biotechnol* 281**,** 161-167. doi: 10.1016/j.jbiotec.2018.07.019.

Kasai, Y., Inoue, J., and Harayama, S. (2001). The TOL plasmid pWW0 *xylN* gene product from *Pseudomonas putida* is involved in m-xylene uptake. *J Bacteriol* 183(22)**,** 6662-6666. doi: 10.1128/JB.183.22.6662-6666.2001.

Kille, S., Zilly, F.E., Acevedo, J.P., and Reetz, M.T. (2011). Regio- and stereoselectivity of P450-catalysed hydroxylation of steroids controlled by laboratory evolution. *Nat Chem* 3(9)**,** 738-743. doi: 10.1038/nchem.1113.

Kothari, A., Charrier, M., Wu, Y.-W., Malfatti, S., Zhou, C.E., Singer, S.W., et al. (2016). Transcriptomic analysis of the highly efficient oil-degrading bacterium *Acinetobacter venetianus* RAG-1 reveals genes important in dodecane uptake and utilization. *FEMS Microbiol Lett* 363(20)**,** fnw224. doi: 10.1093/femsle/fnw224.

Liu, Z., Ghai, I., Winterhalter, M., and Schwaneberg, U. (2017). Engineering enhanced pore sizes using FhuA Δ1-160 from *E. coli* outer membrane as template. *ACS Sens* 2(11)**,** 1619-1626. doi: 10.1021/acssensors.7b00481.

Mounier, J., Hakil, F., Branchu, P., Naïtali, M., Goulas, P., Sivadon, P., et al. (2018). AupA and AupB are outer and inner membrane proteins involved in alkane uptake in *Marinobacter hydrocarbonoclasticus* SP17. *mBio* 9(3)**,** e00520-00518. doi: 10.1128/mBio.00520-18.

Olivera, E.R., and Luengo, J.M. (2019). Steroids as environmental compounds recalcitrant to degradation: genetic mechanisms of bacterial biodegradation pathways. *Genes (Basel)* 10(7)**,** 512. doi: 10.3390/genes10070512.

Ruff, A.J., Arlt, M., van Ohlen, M., Kardashliev, T., Konarzycka-Bessler, M., Bocola, M., et al. (2016). An engineered outer membrane pore enables an efficient oxygenation of aromatics and terpenes. *J Mol Catal B Enzym* 134**,** 285-294. doi: 10.1016/j.molcatb.2016.11.007.

van Beilen, J.B., Eggink, G., Enequist, H., Bos, R., and Witholt, B. (1992). DNA sequence determination and functional characterization of the OCT-plasmid-encoded *alkJKL* genes of *Pseudomonas oleovorans*. *Mol Microbiol* 6(21)**,** 3121-3136. doi: 10.1111/j.1365-2958.1992.tb01769.x.

Wang, Y., Rawlings, M., Gibson, D.T., Labbé, D., Bergeron, H., Brousseau, R., et al. (1995). Identification of a membrane protein and a truncated LysR-type regulator associated with the toluene degradation pathway in *Pseudomonas putida* F1. *Mol Gen Genet* 246(5)**,** 570-579. doi: 10.1007/BF00298963.
